# Supplementary material for: Lineage‐specific plastid degradation in subtribe Gentianinae (Gentianaceae)
Source: PubMed Central journal article supplement (PMC8019047; doi:10.1002/ece3.7281), 2021-02-22
Supplement: ECE3-11-3286-s002.pdf [file ECE3-11-3286-s002.pdf]

## APPENDIX B

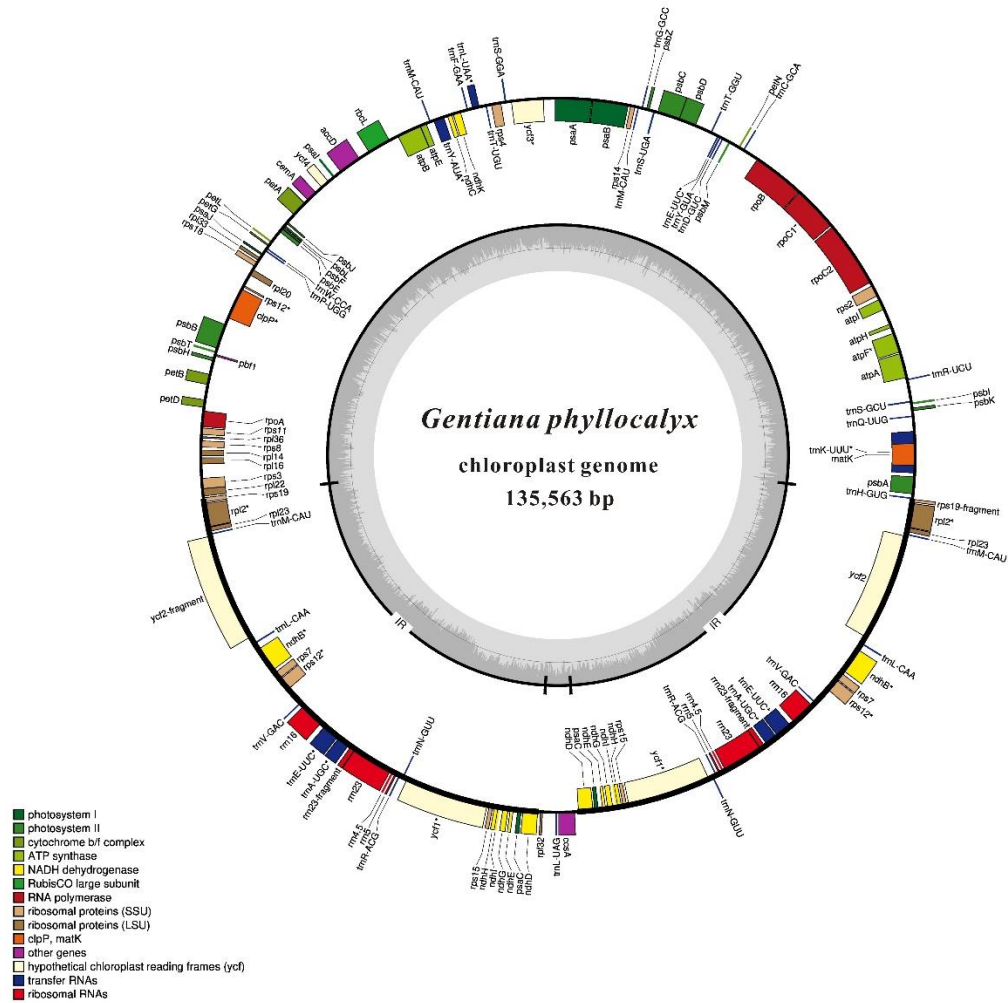

**FIGURE B1** Map of the plastome of *Gentiana phyllocalyx*. Genes drawn inside the circle are transcribed clockwise, and those drawn outside are transcribed counterclockwise. Genes belonging to different functional groups are shown in different colours.

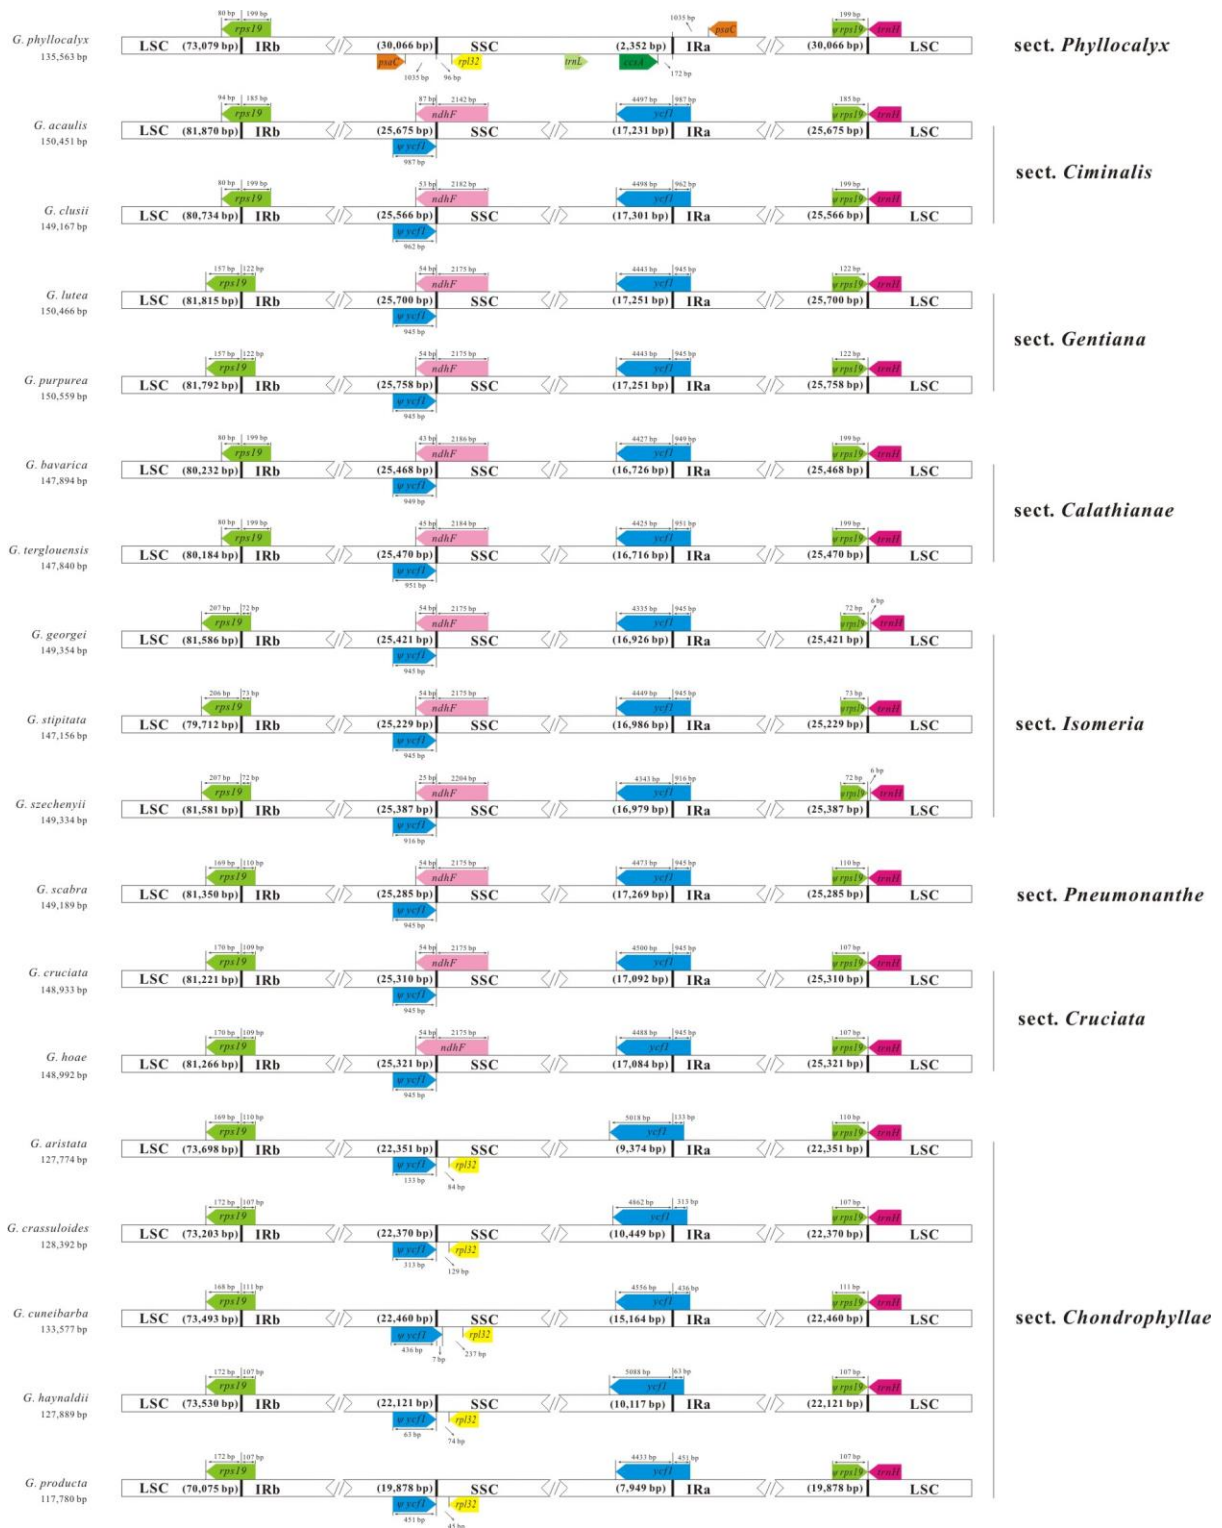



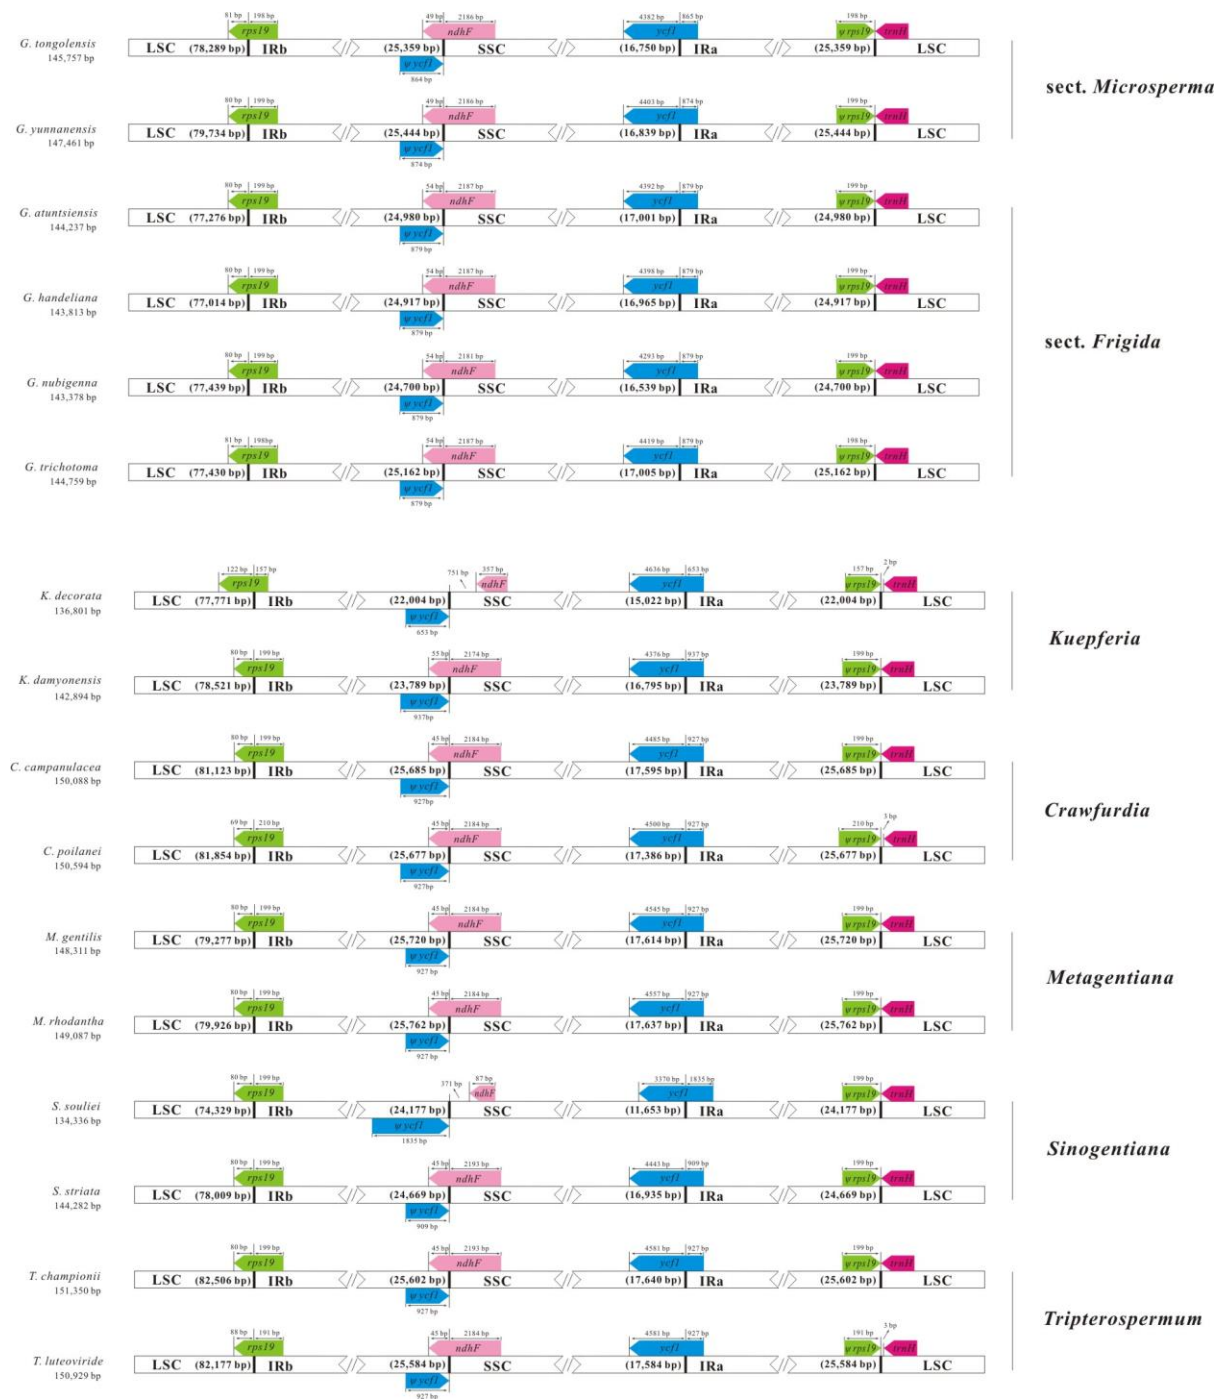

**FIGURE B2** Comparison of LSC, IRs, and SSC junction positions among all newly sequenced plastomes in subtribe Gentianeae, along with seven published plastomes in *Gentiana* sect. *Kudoa*.
