# Supplementary material for: Lineage‐specific plastid degradation in subtribe Gentianinae (Gentianaceae)
Source: PubMed Central journal article supplement (PMC8019047; doi:10.1002/ece3.7281), 2021-02-22
Supplement: ECE3-11-3286-s006.pdf [file ECE3-11-3286-s006.pdf]

# SUPPLEMENTARY B

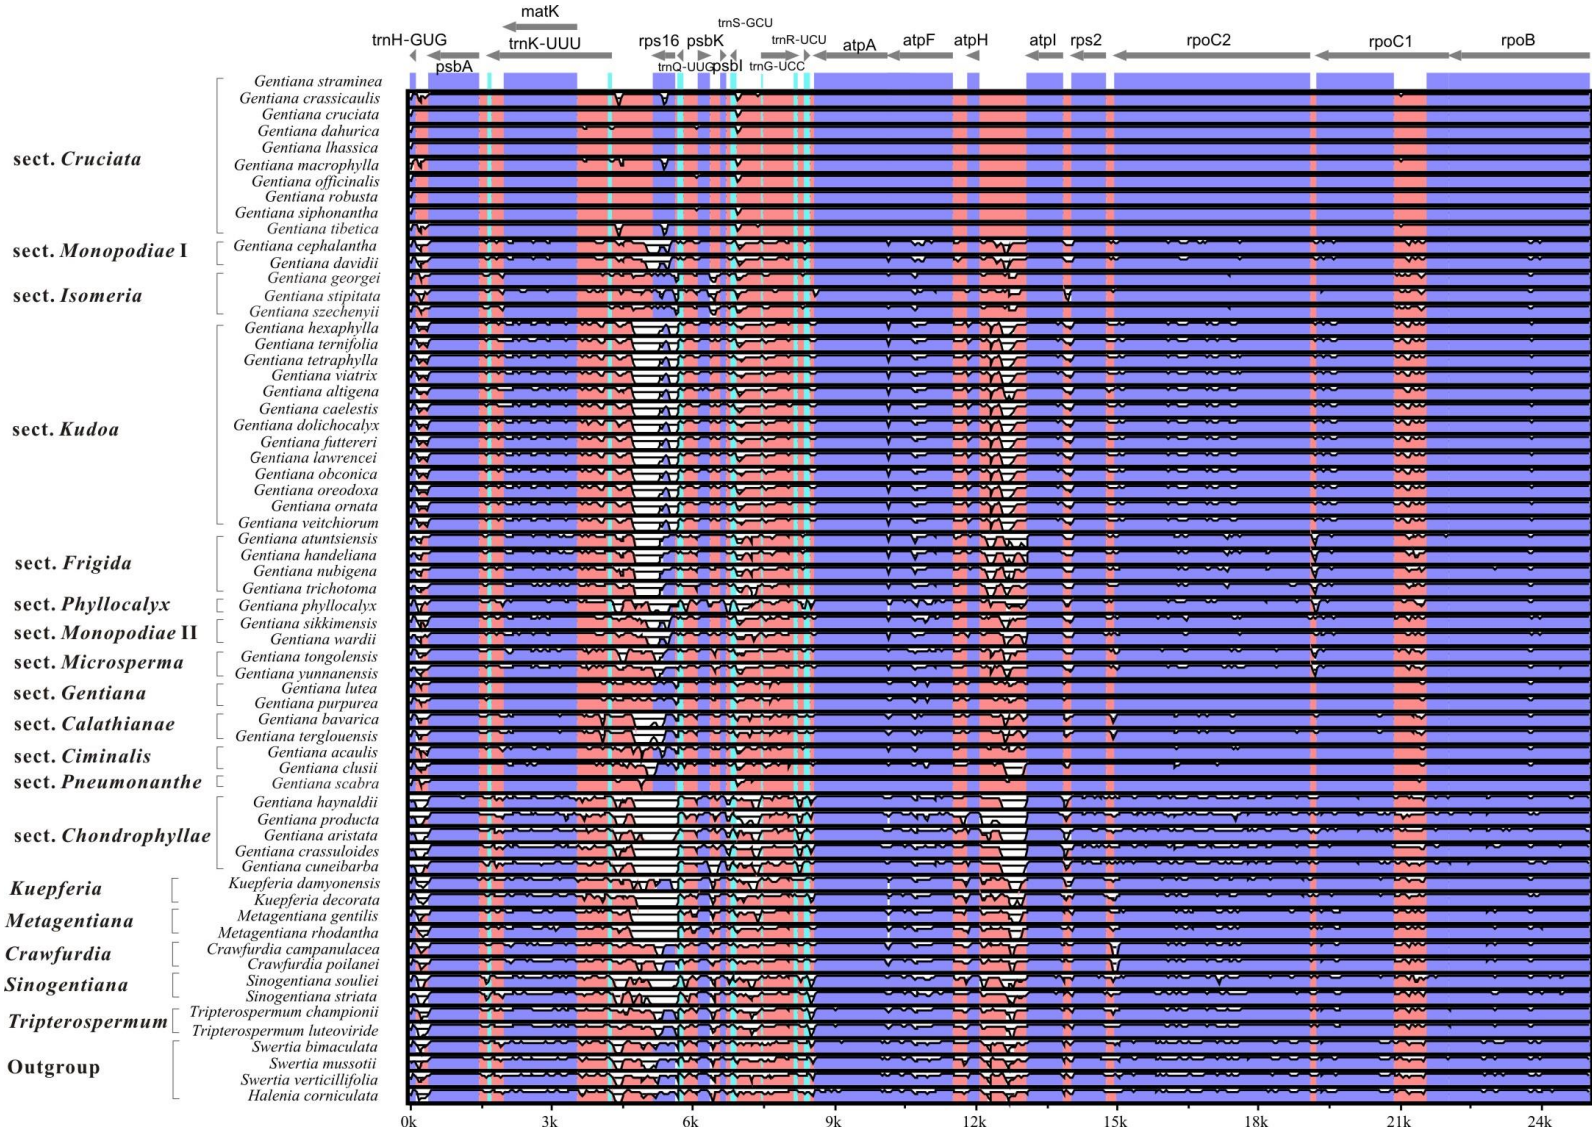



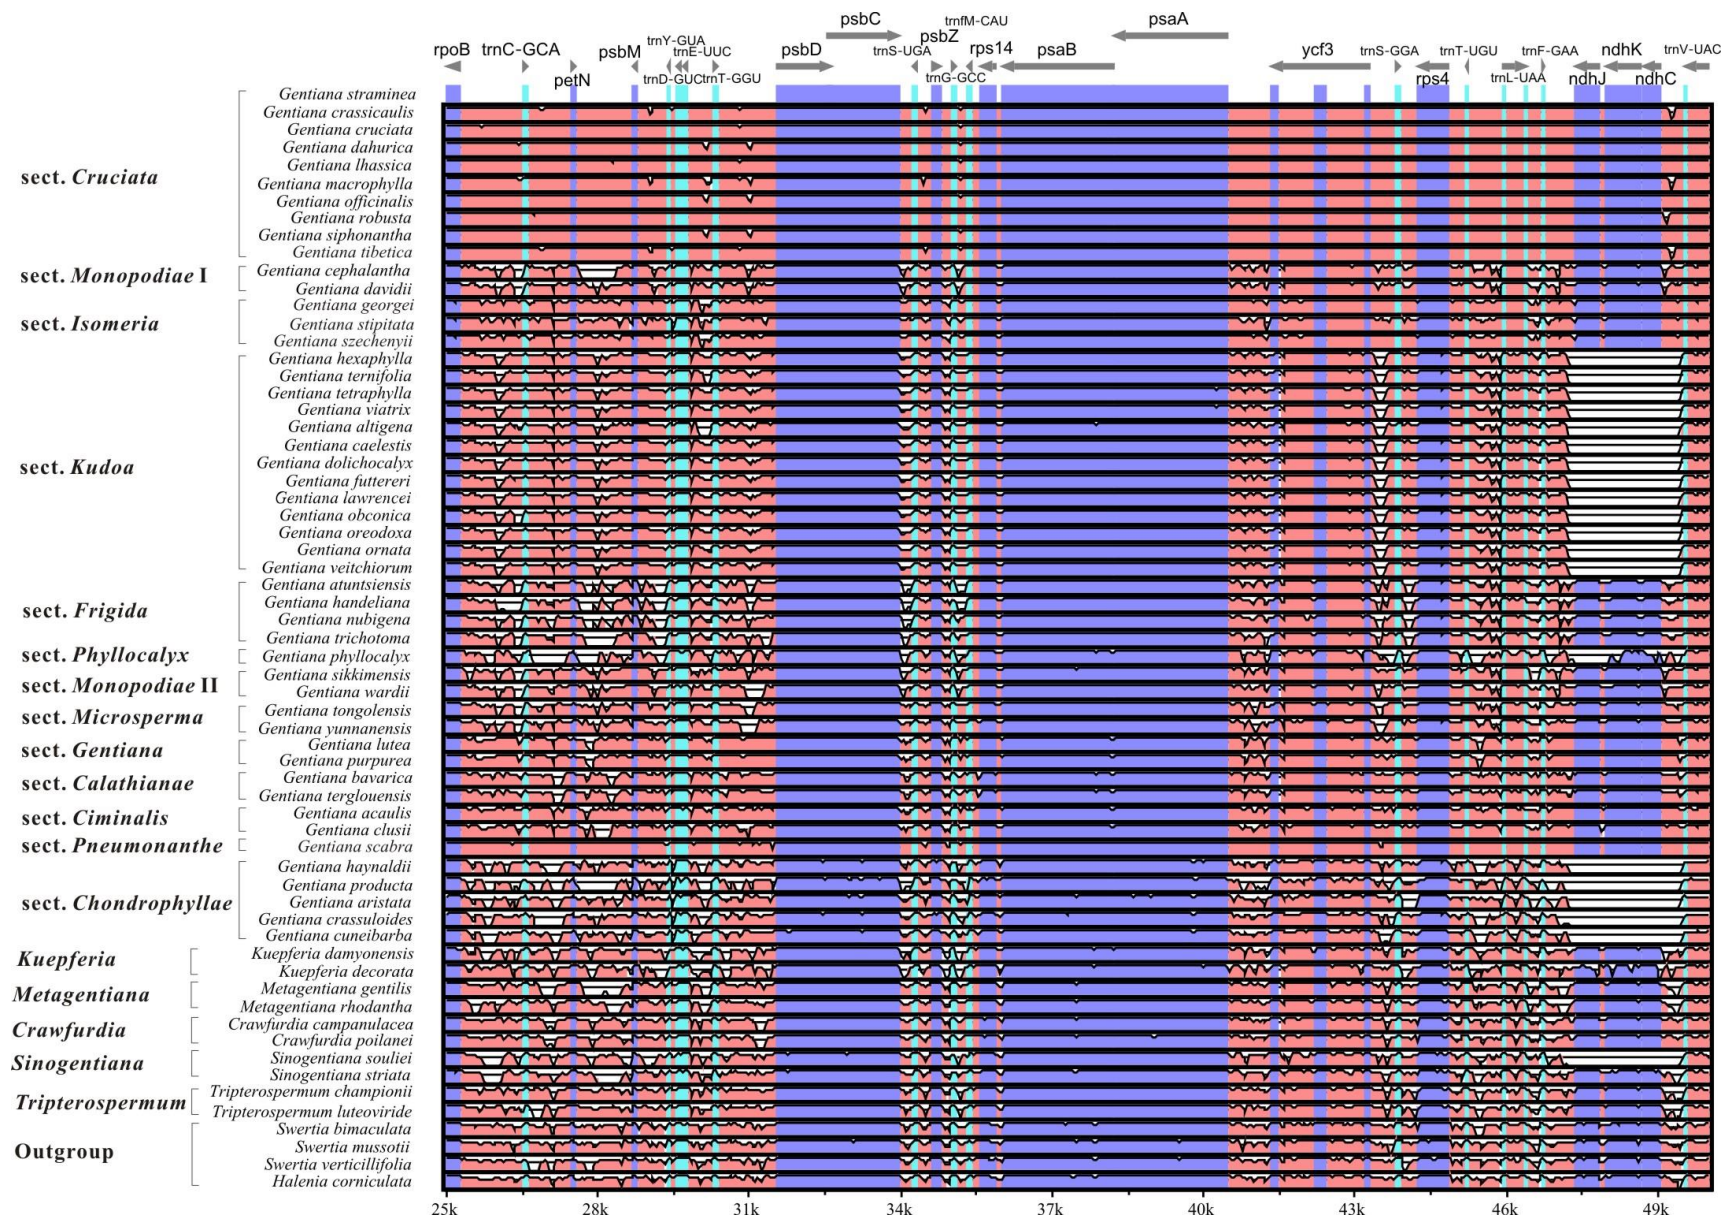



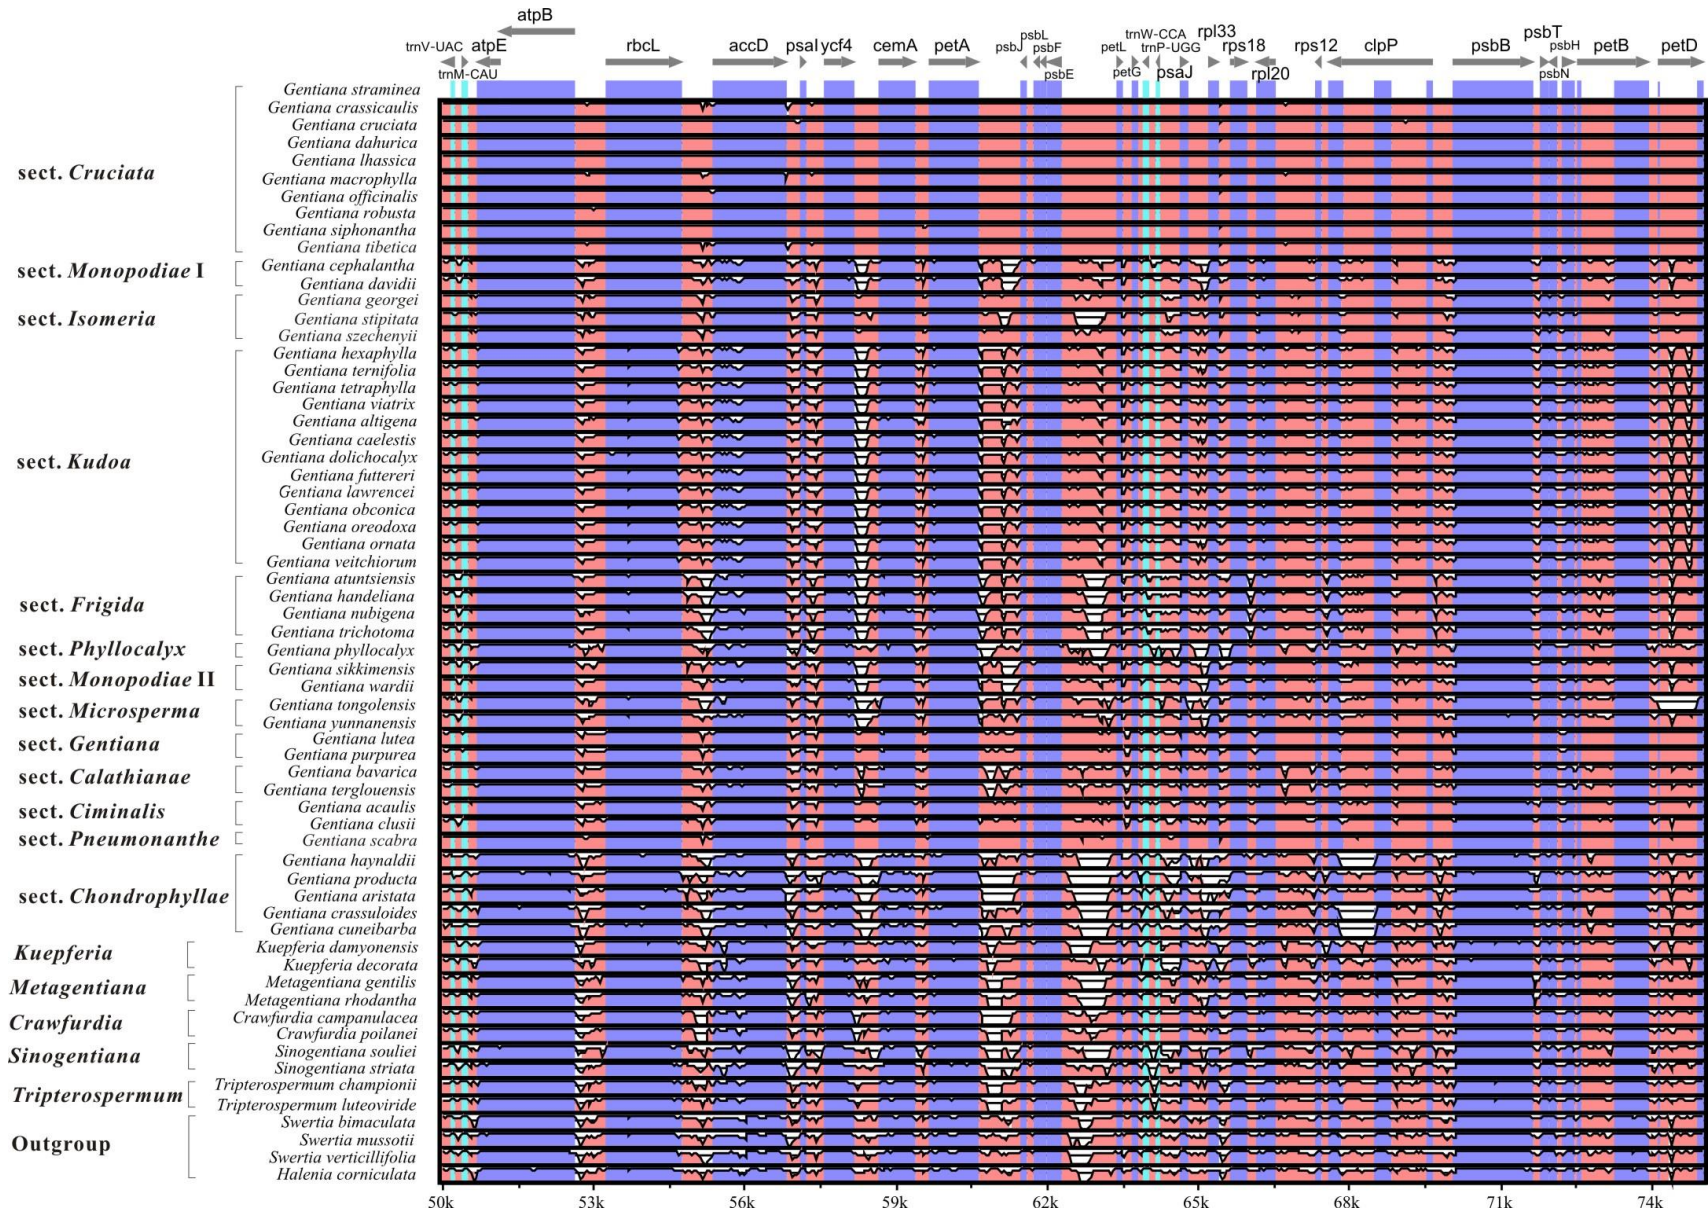



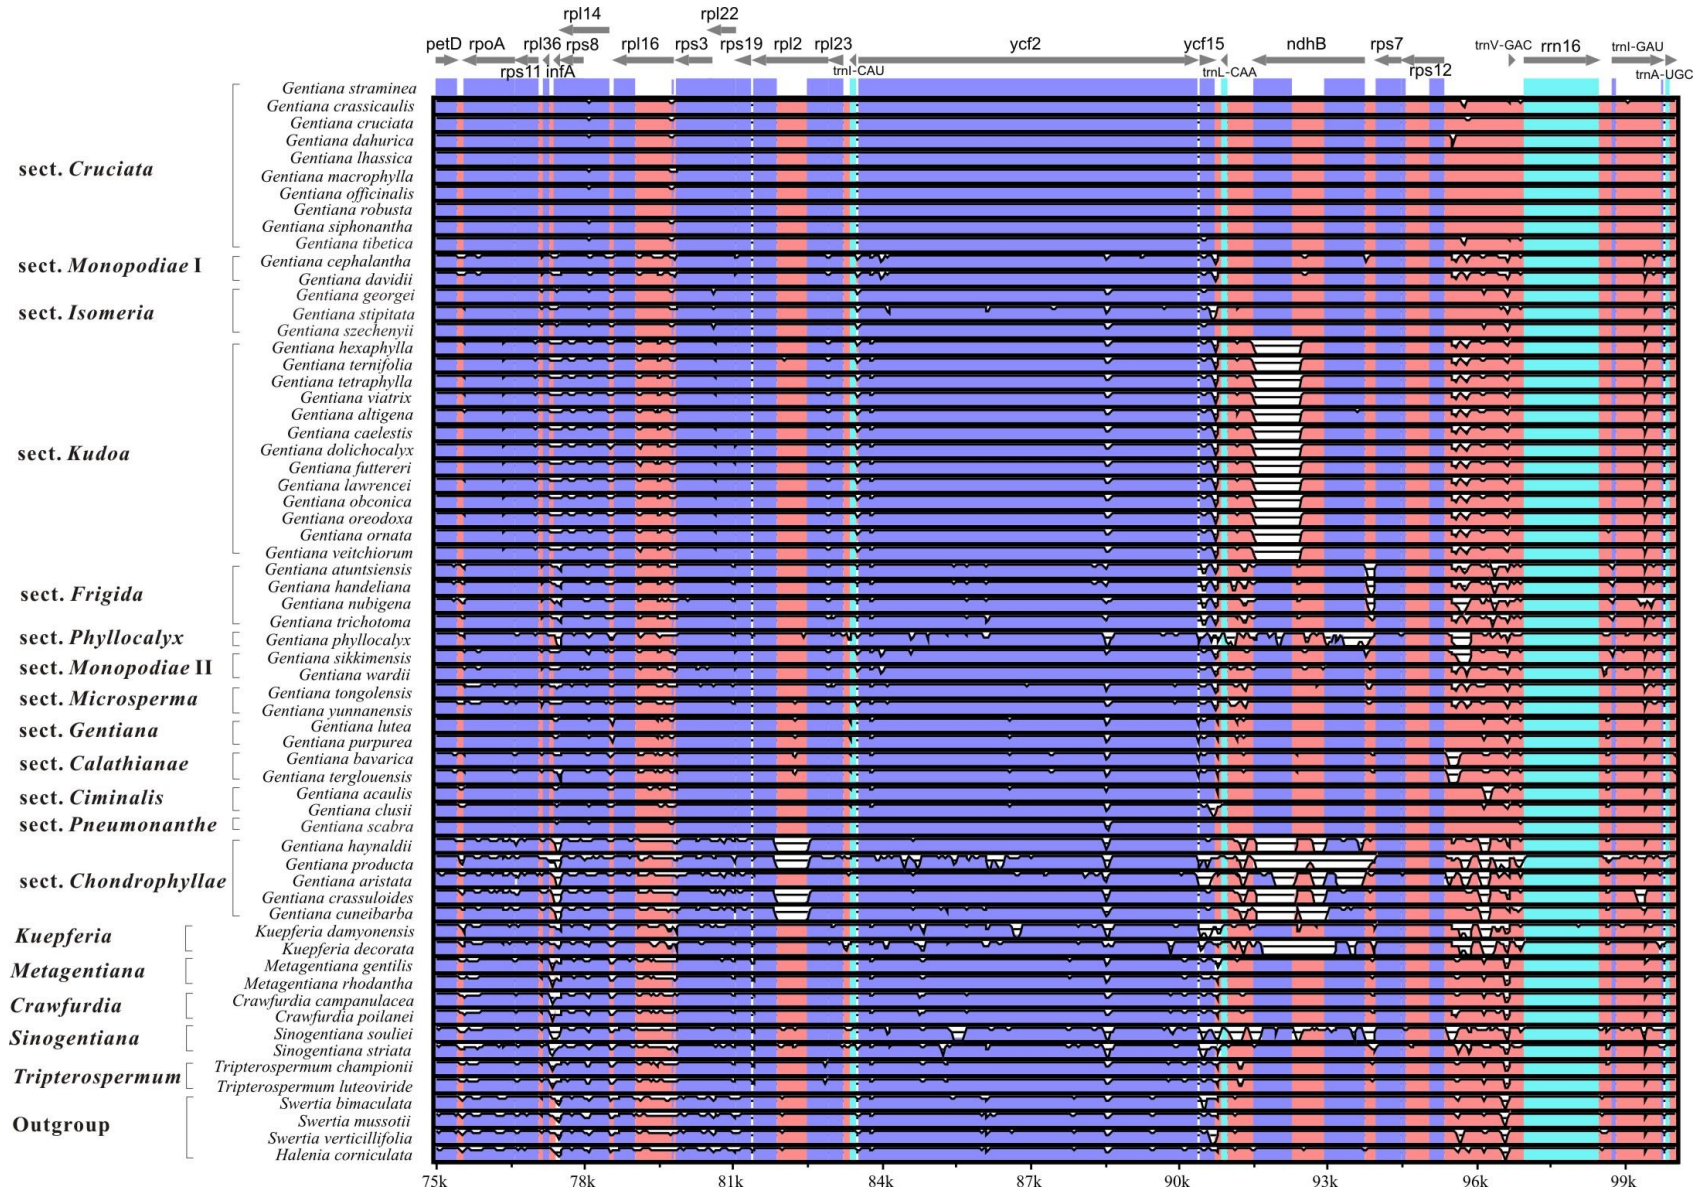



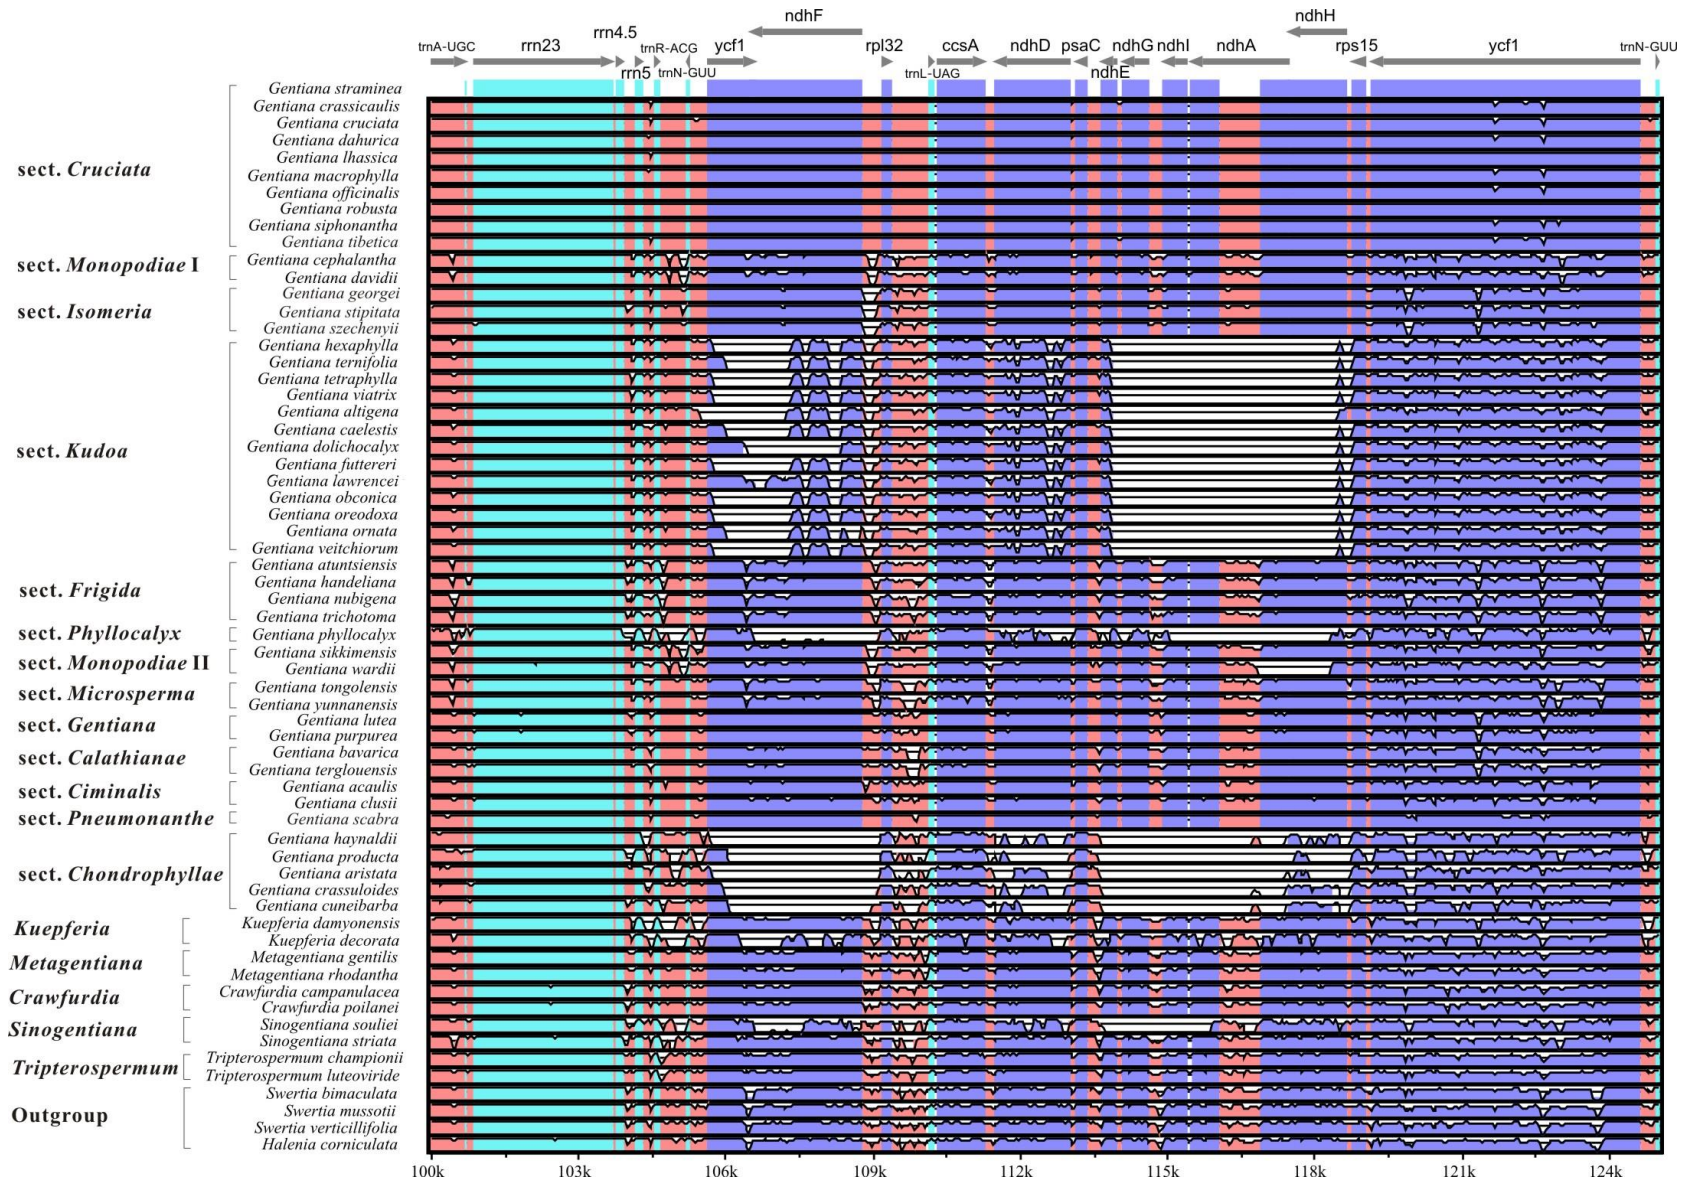

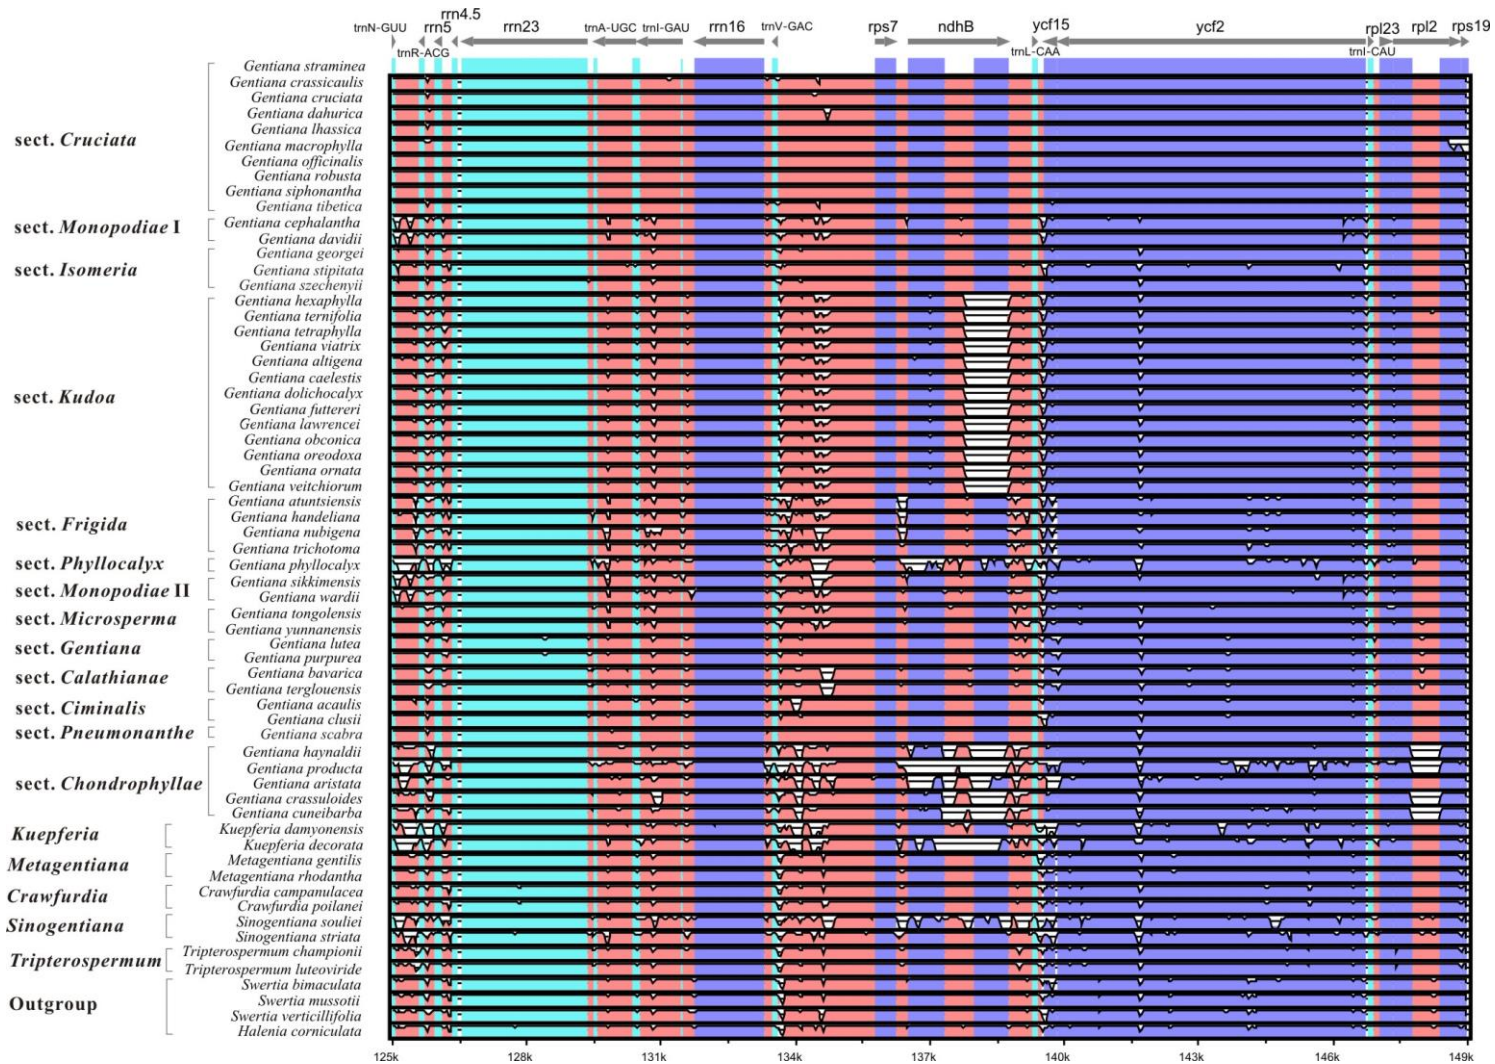

**FIGURE B1** Plastome comparison in subtribe Gentianeae using *Gentiana straminea* as the reference. The arrows on the top show the direction of genes.
